# Supplementary figures and images for: Contrast-Enhanced Mammography versus Breast Magnetic Resonance Imaging: A Systematic Review and Meta-Analysis
Source: MDPI journal article supplement (doi:10.3390/diagnostics12081890), 2022-08-04

# Breast MRI specificity for differential diagnosis of suspicious lesions

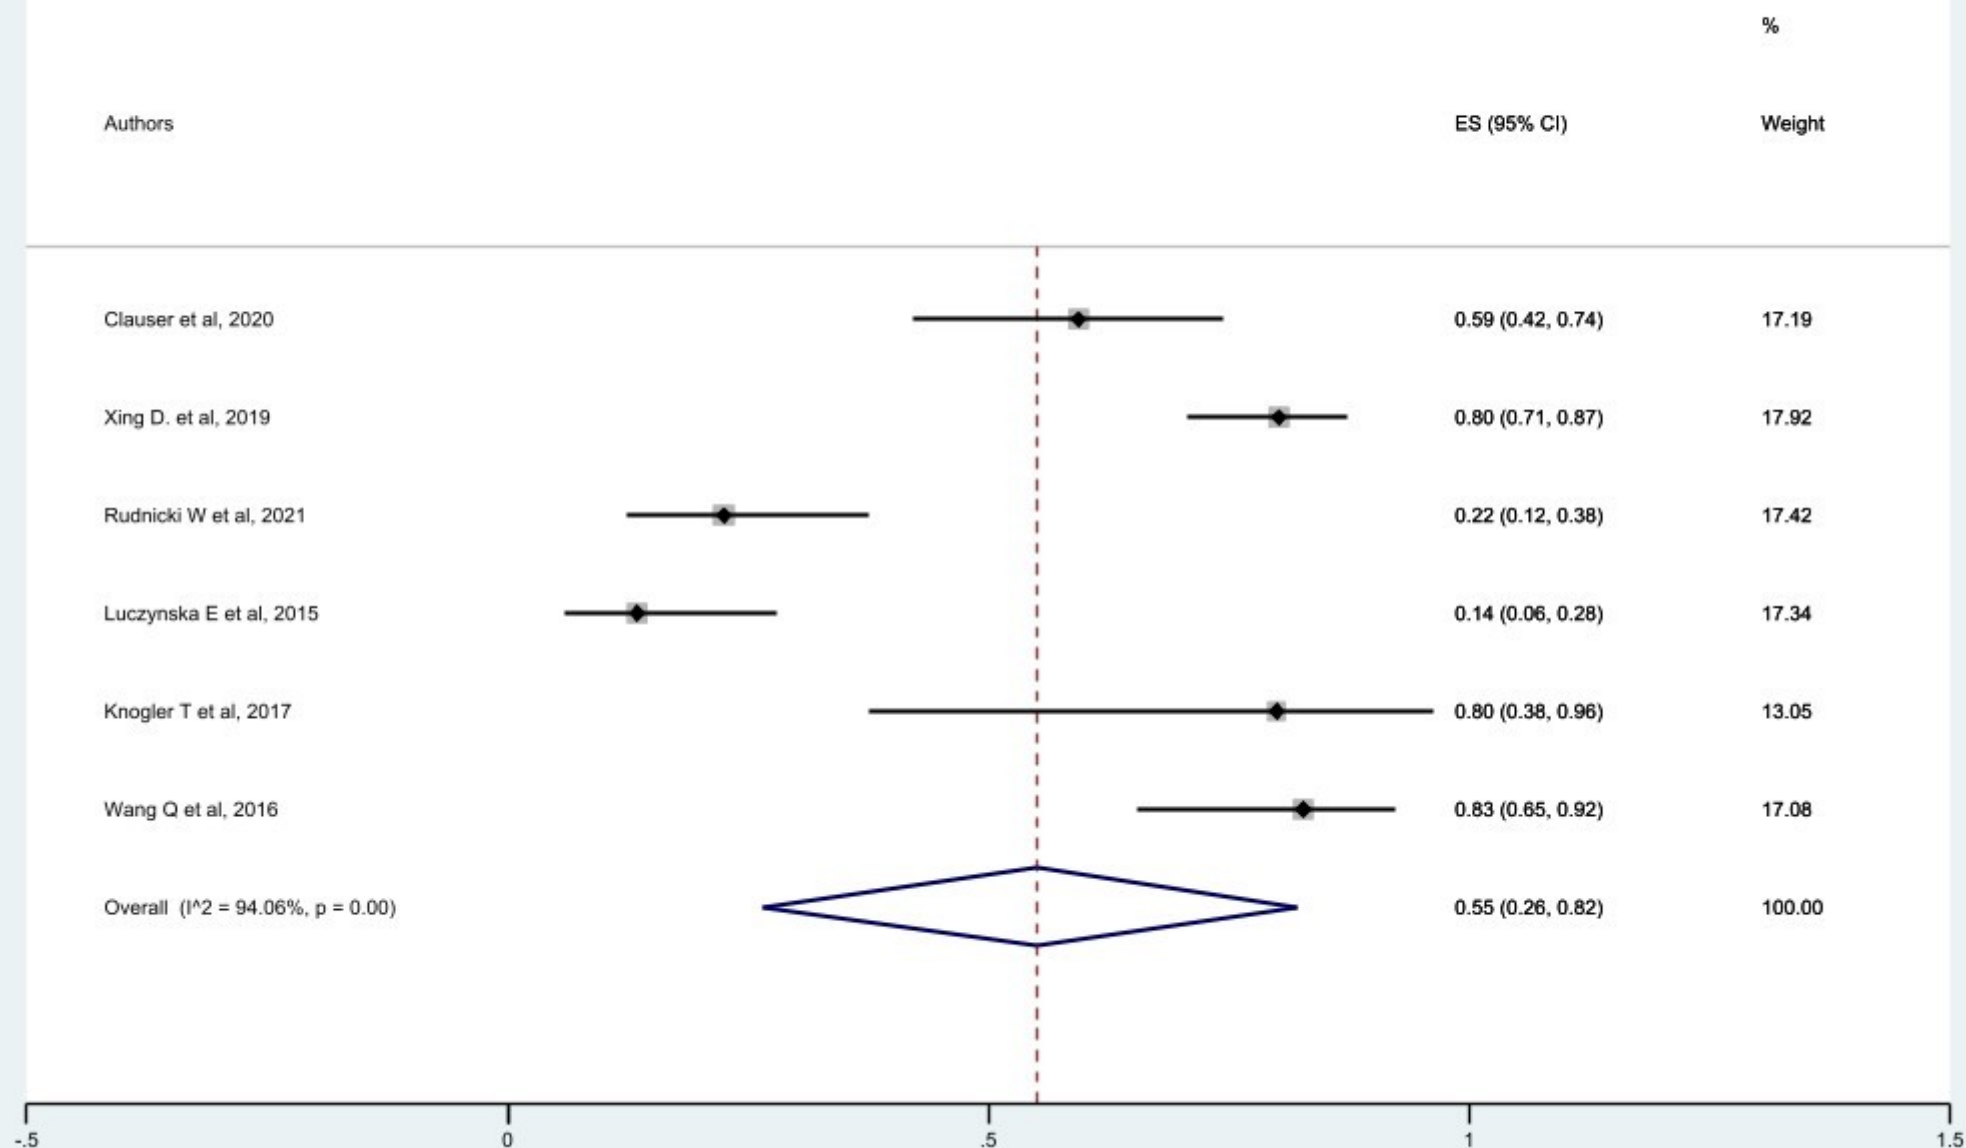

Supplement: s1 [file s1]

# Breast MRI specificity

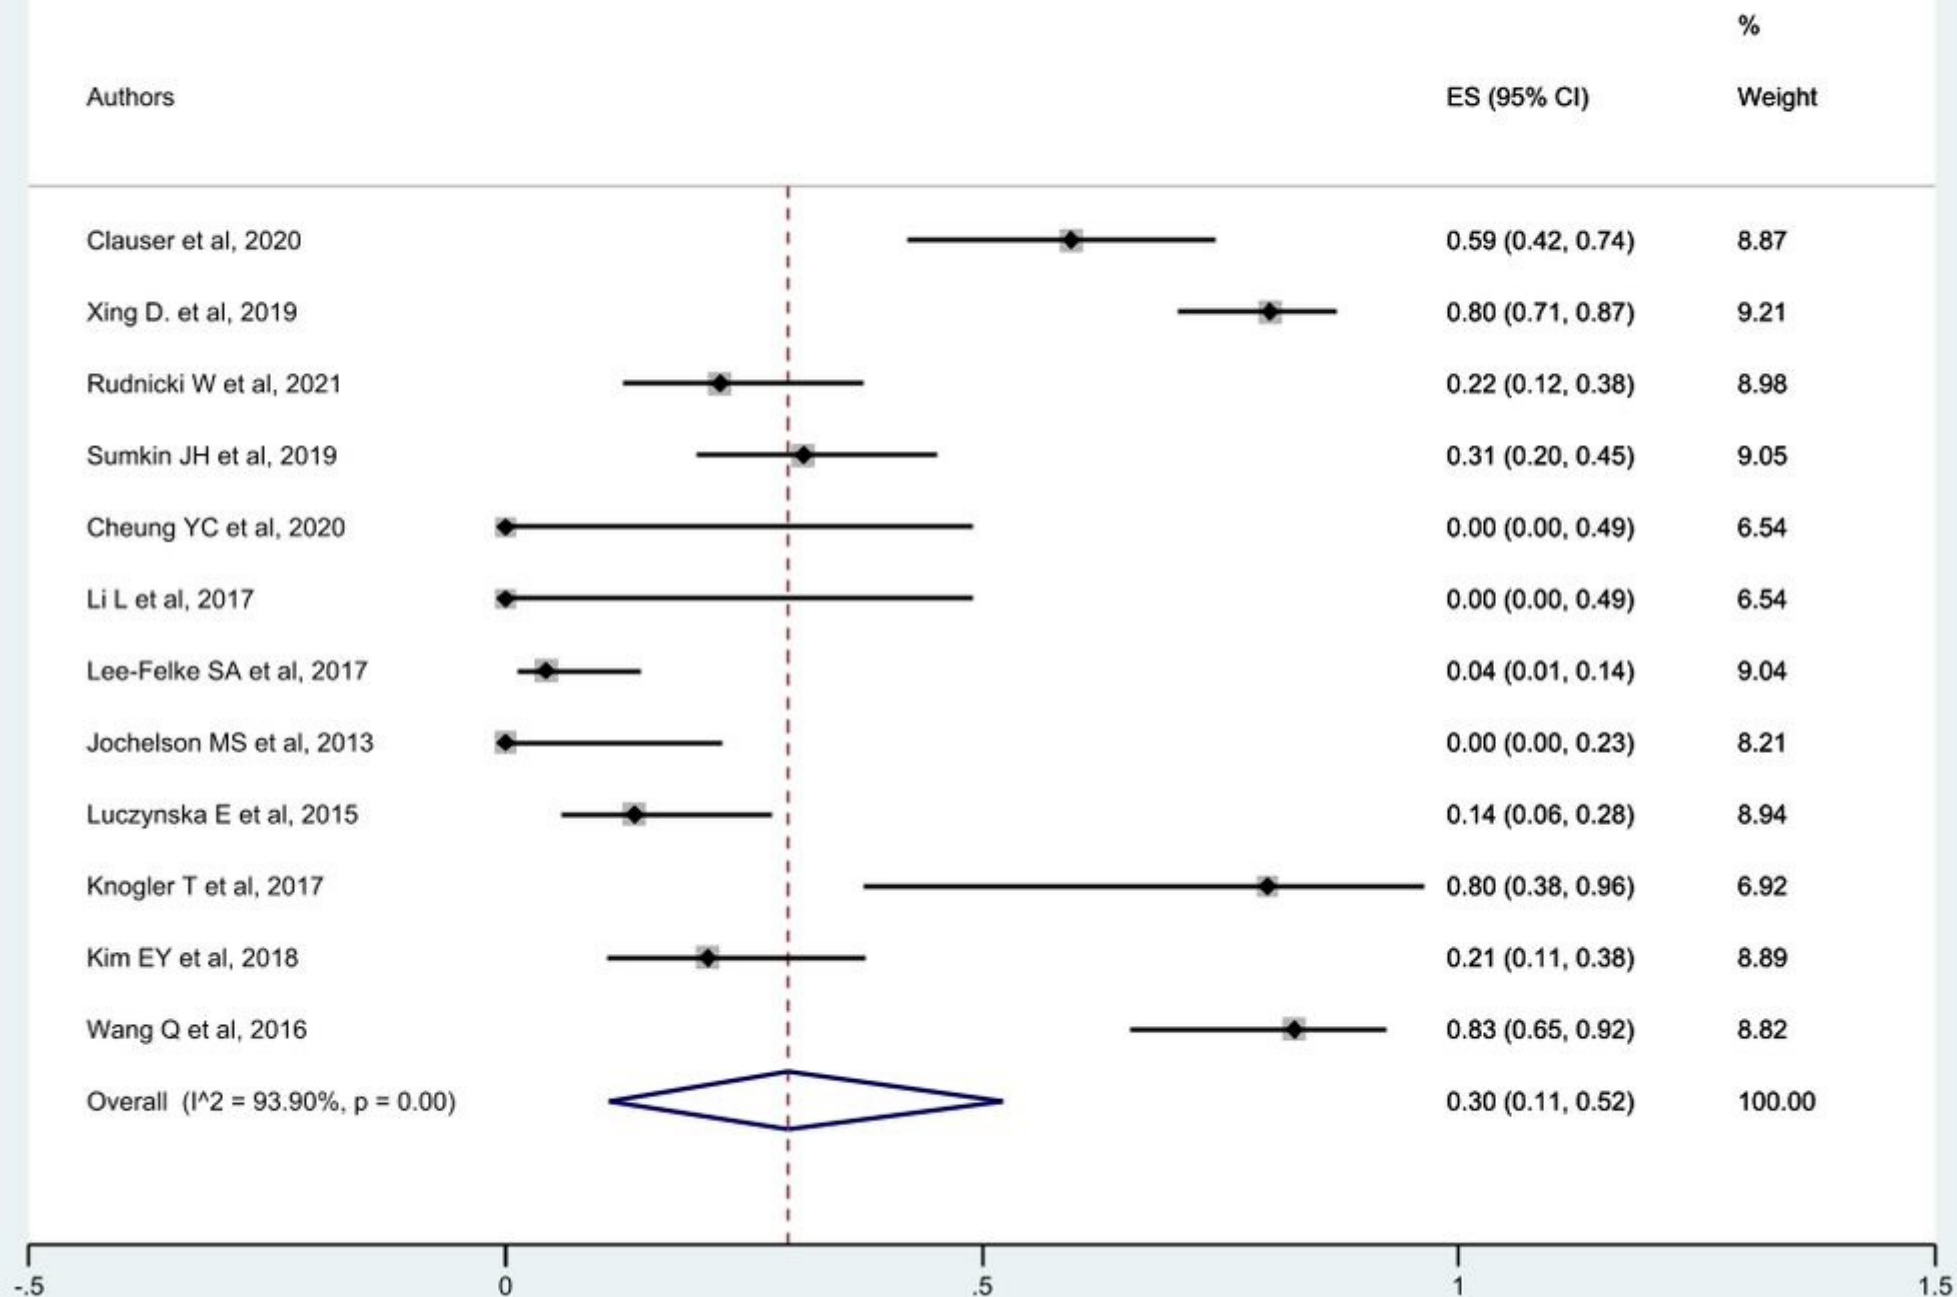

Supplement: s1 [file s1]

# CEM specificity in preoperative staging

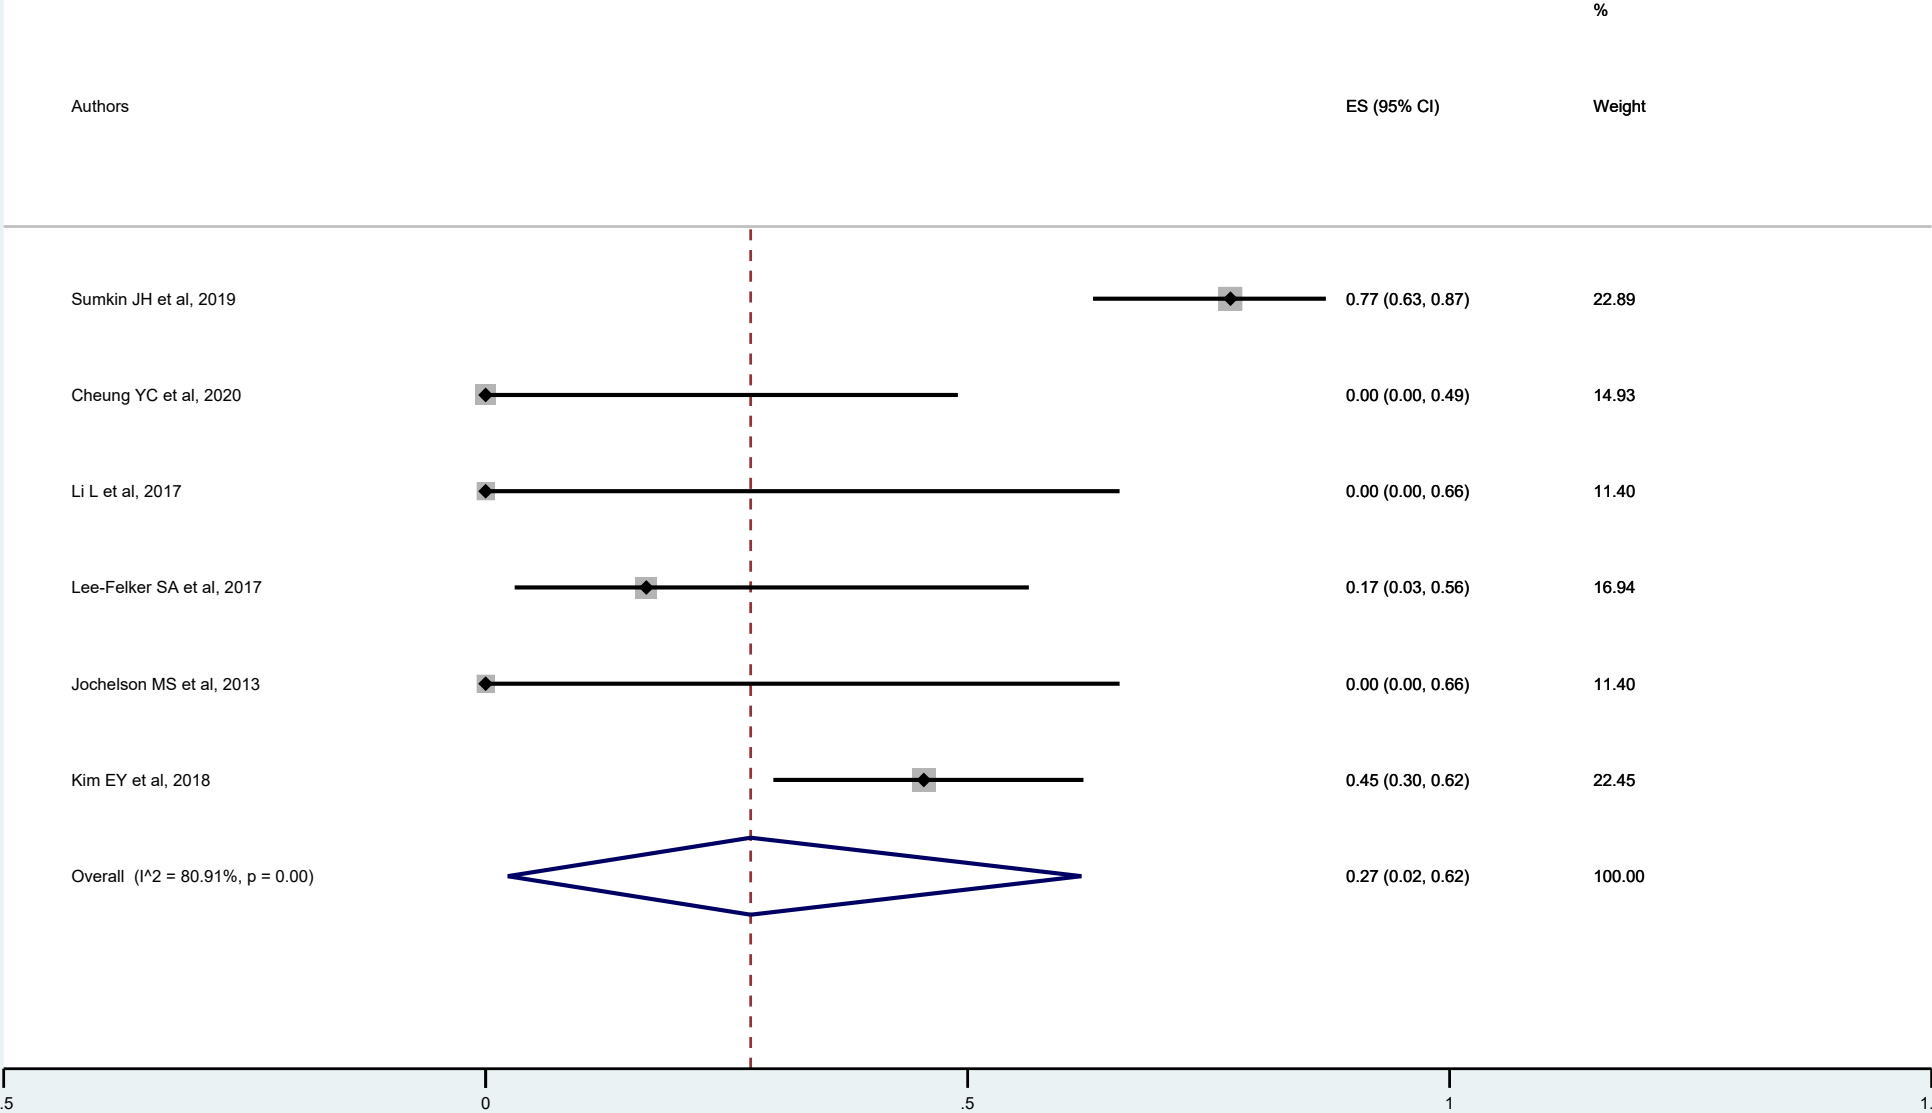

Supplement: s1 [file s1]

# Breast CEM specificity for differential diagnosis of suspicious lesions

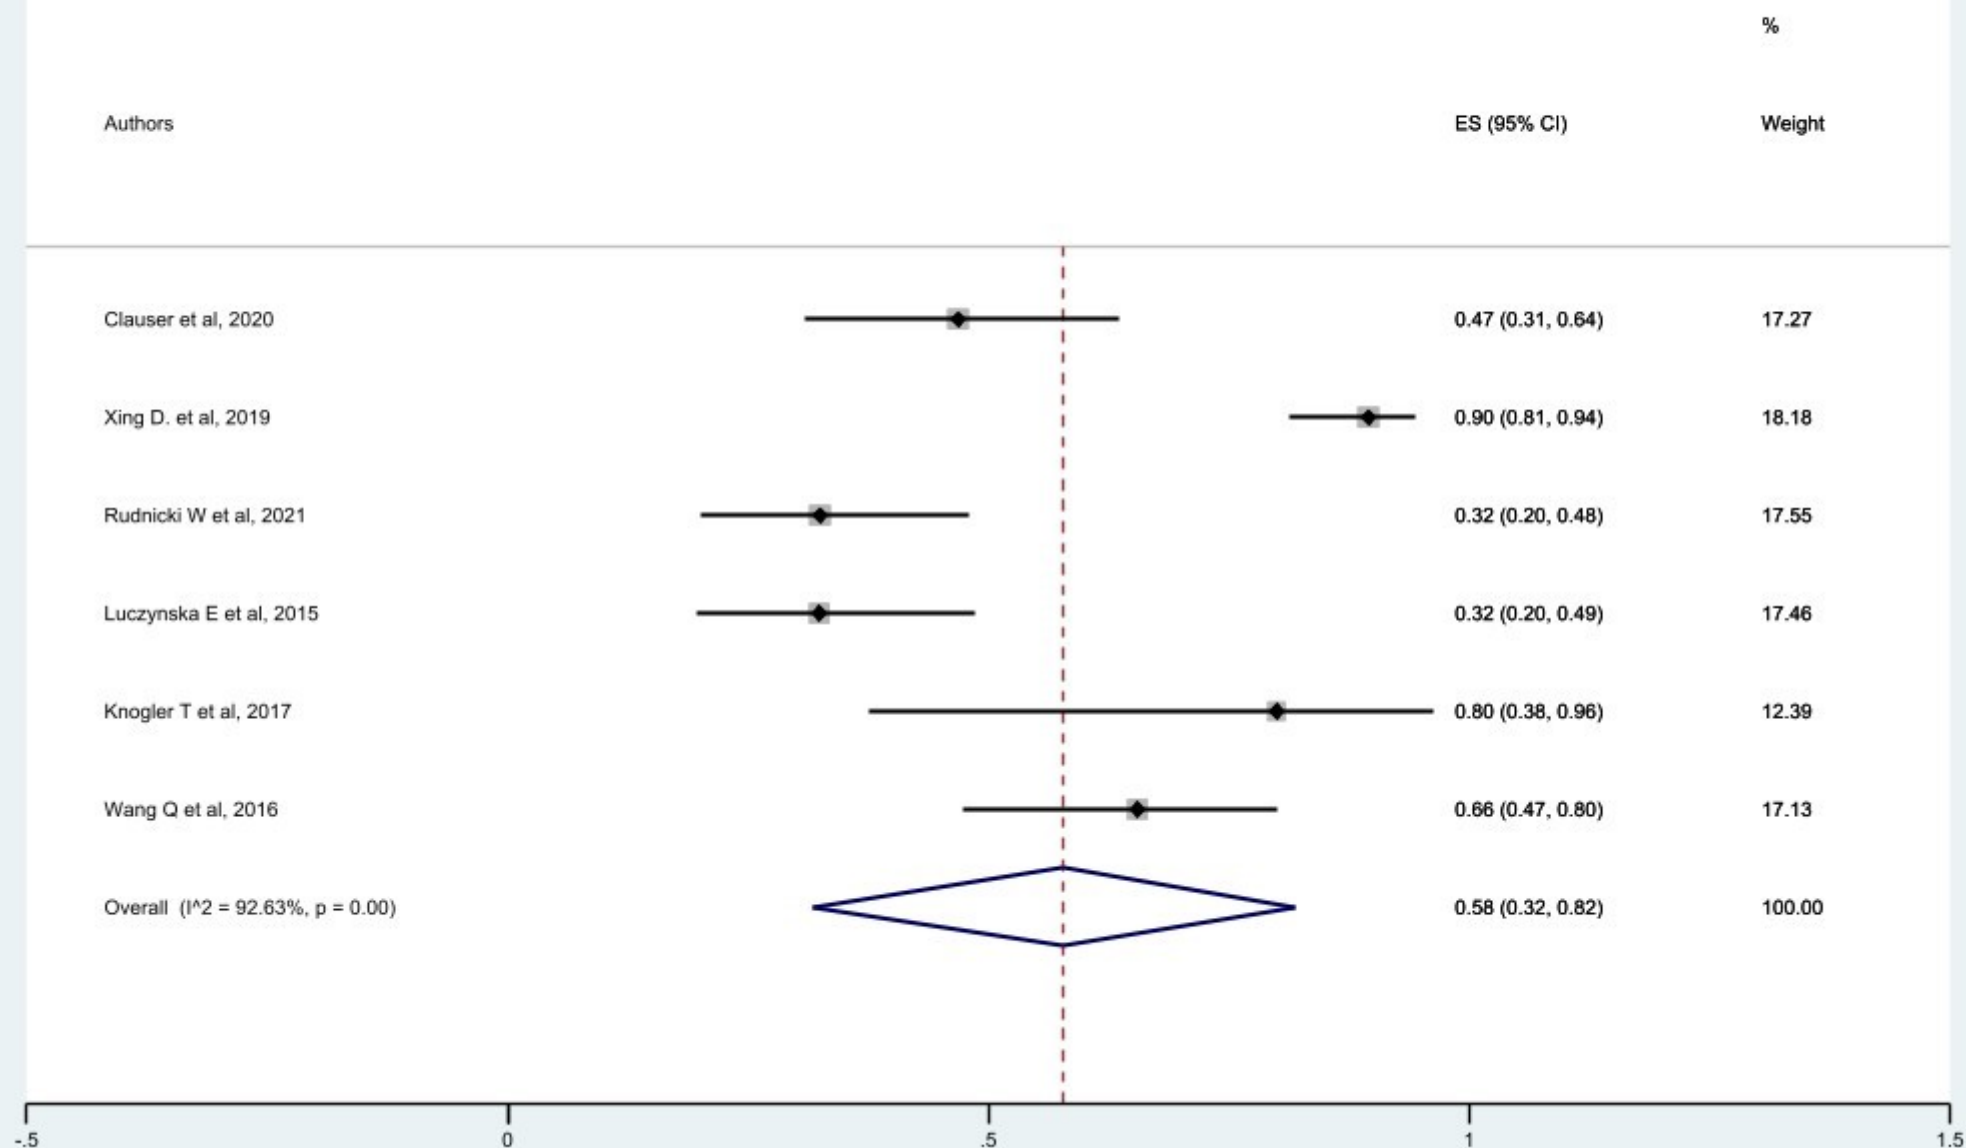

Supplement: s1 [file s1]

# Breast MRI specificity in preoperative staging

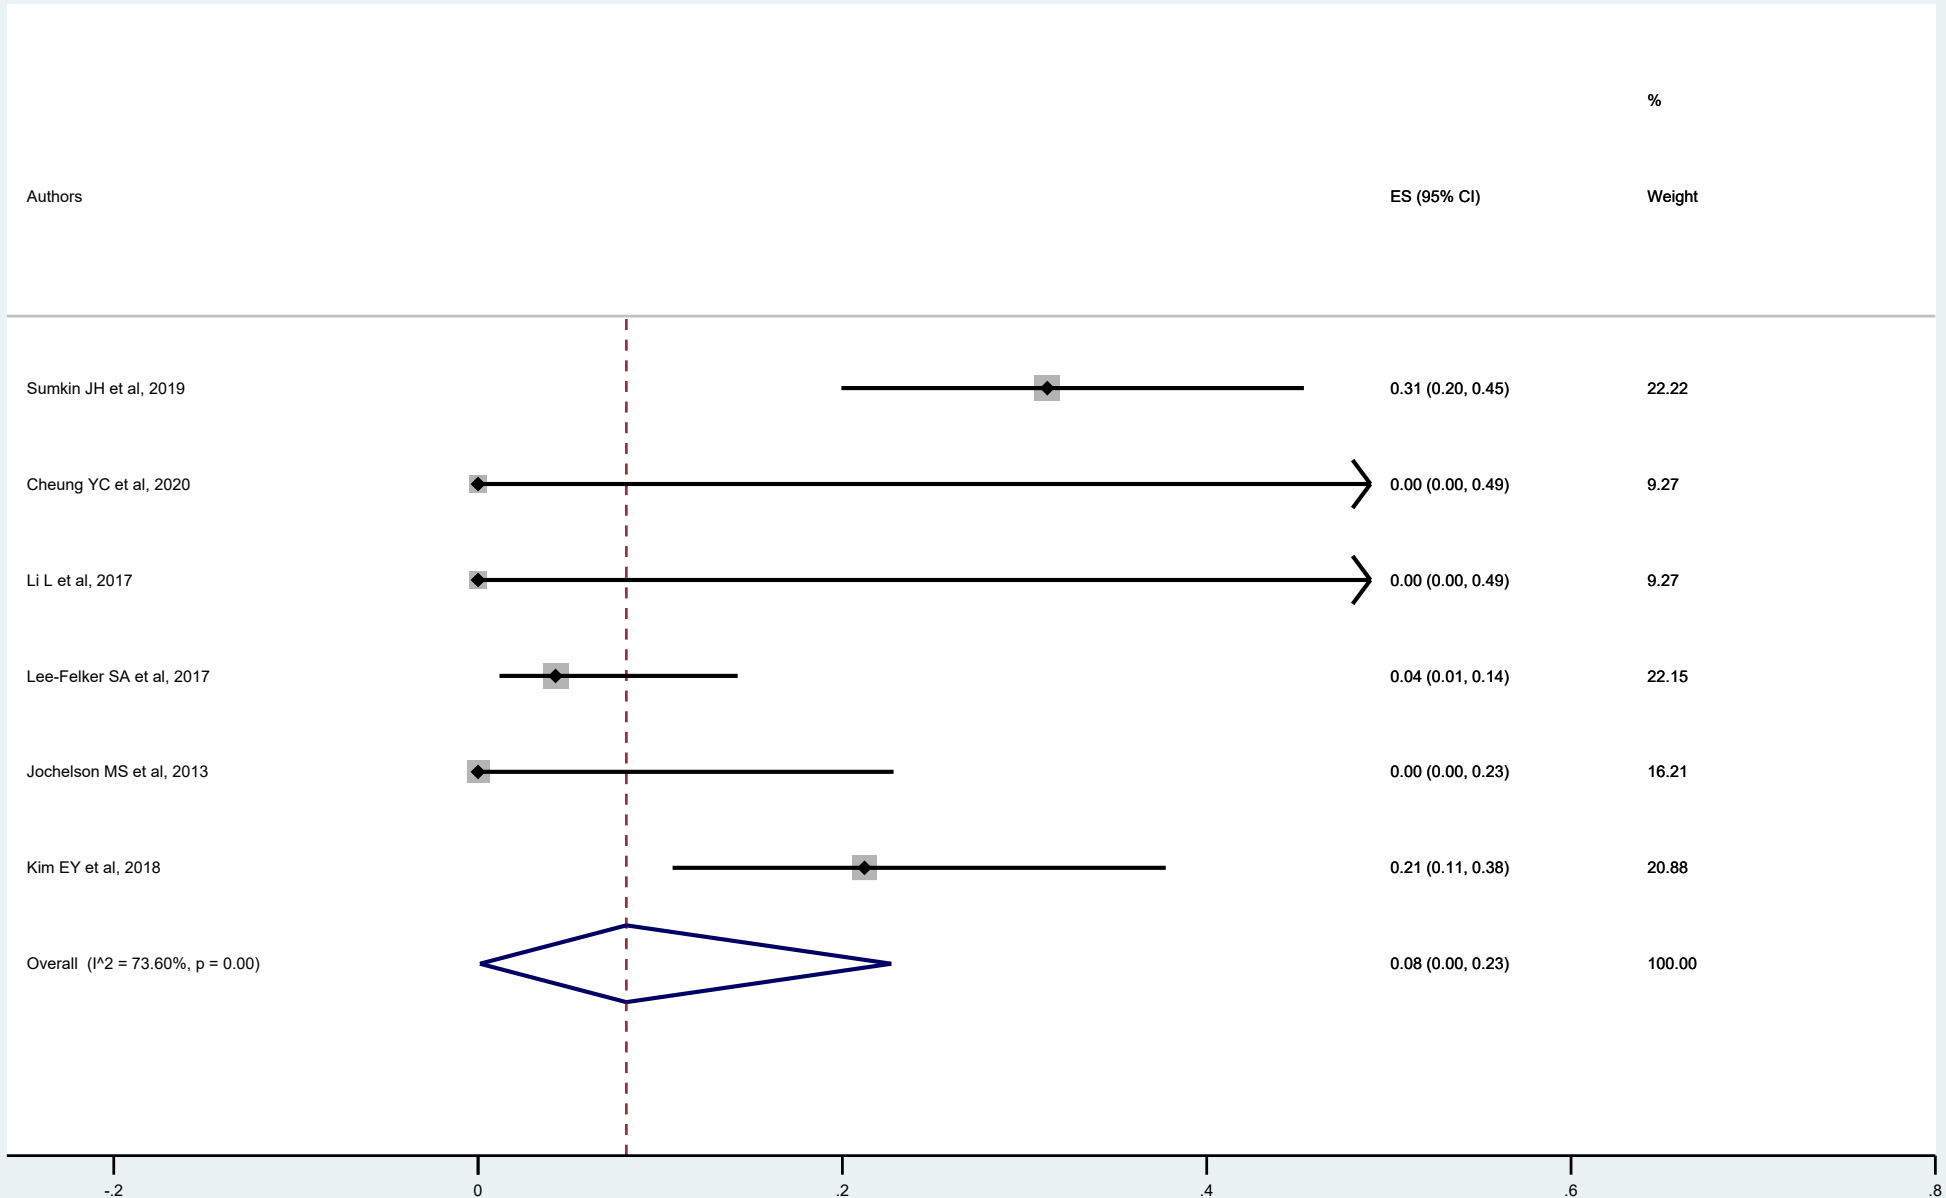

Supplement: s1 [file s1]

# Breast MRI specificity

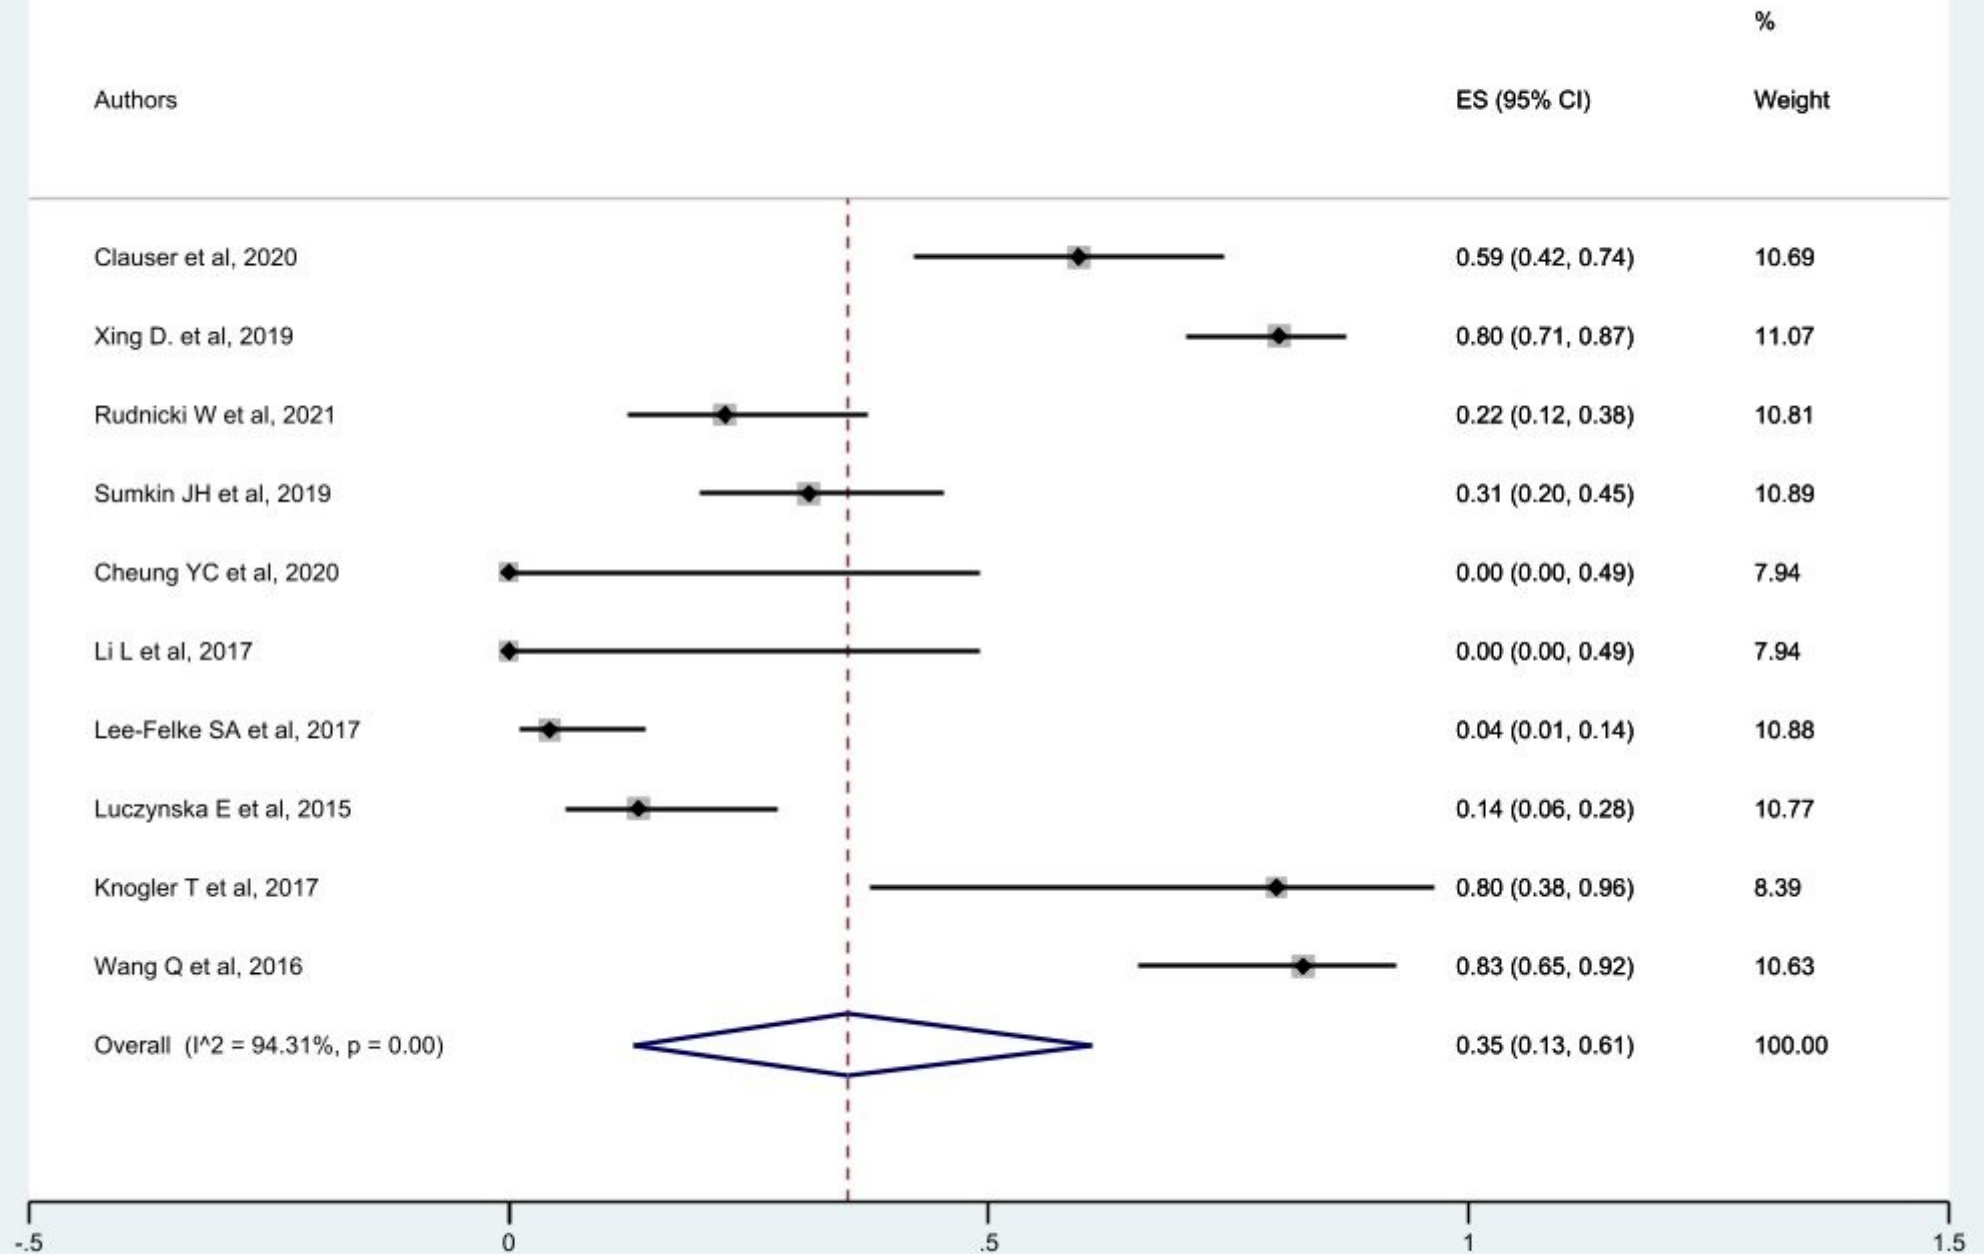

Supplement: s1 [file s1]

# CEM specificity

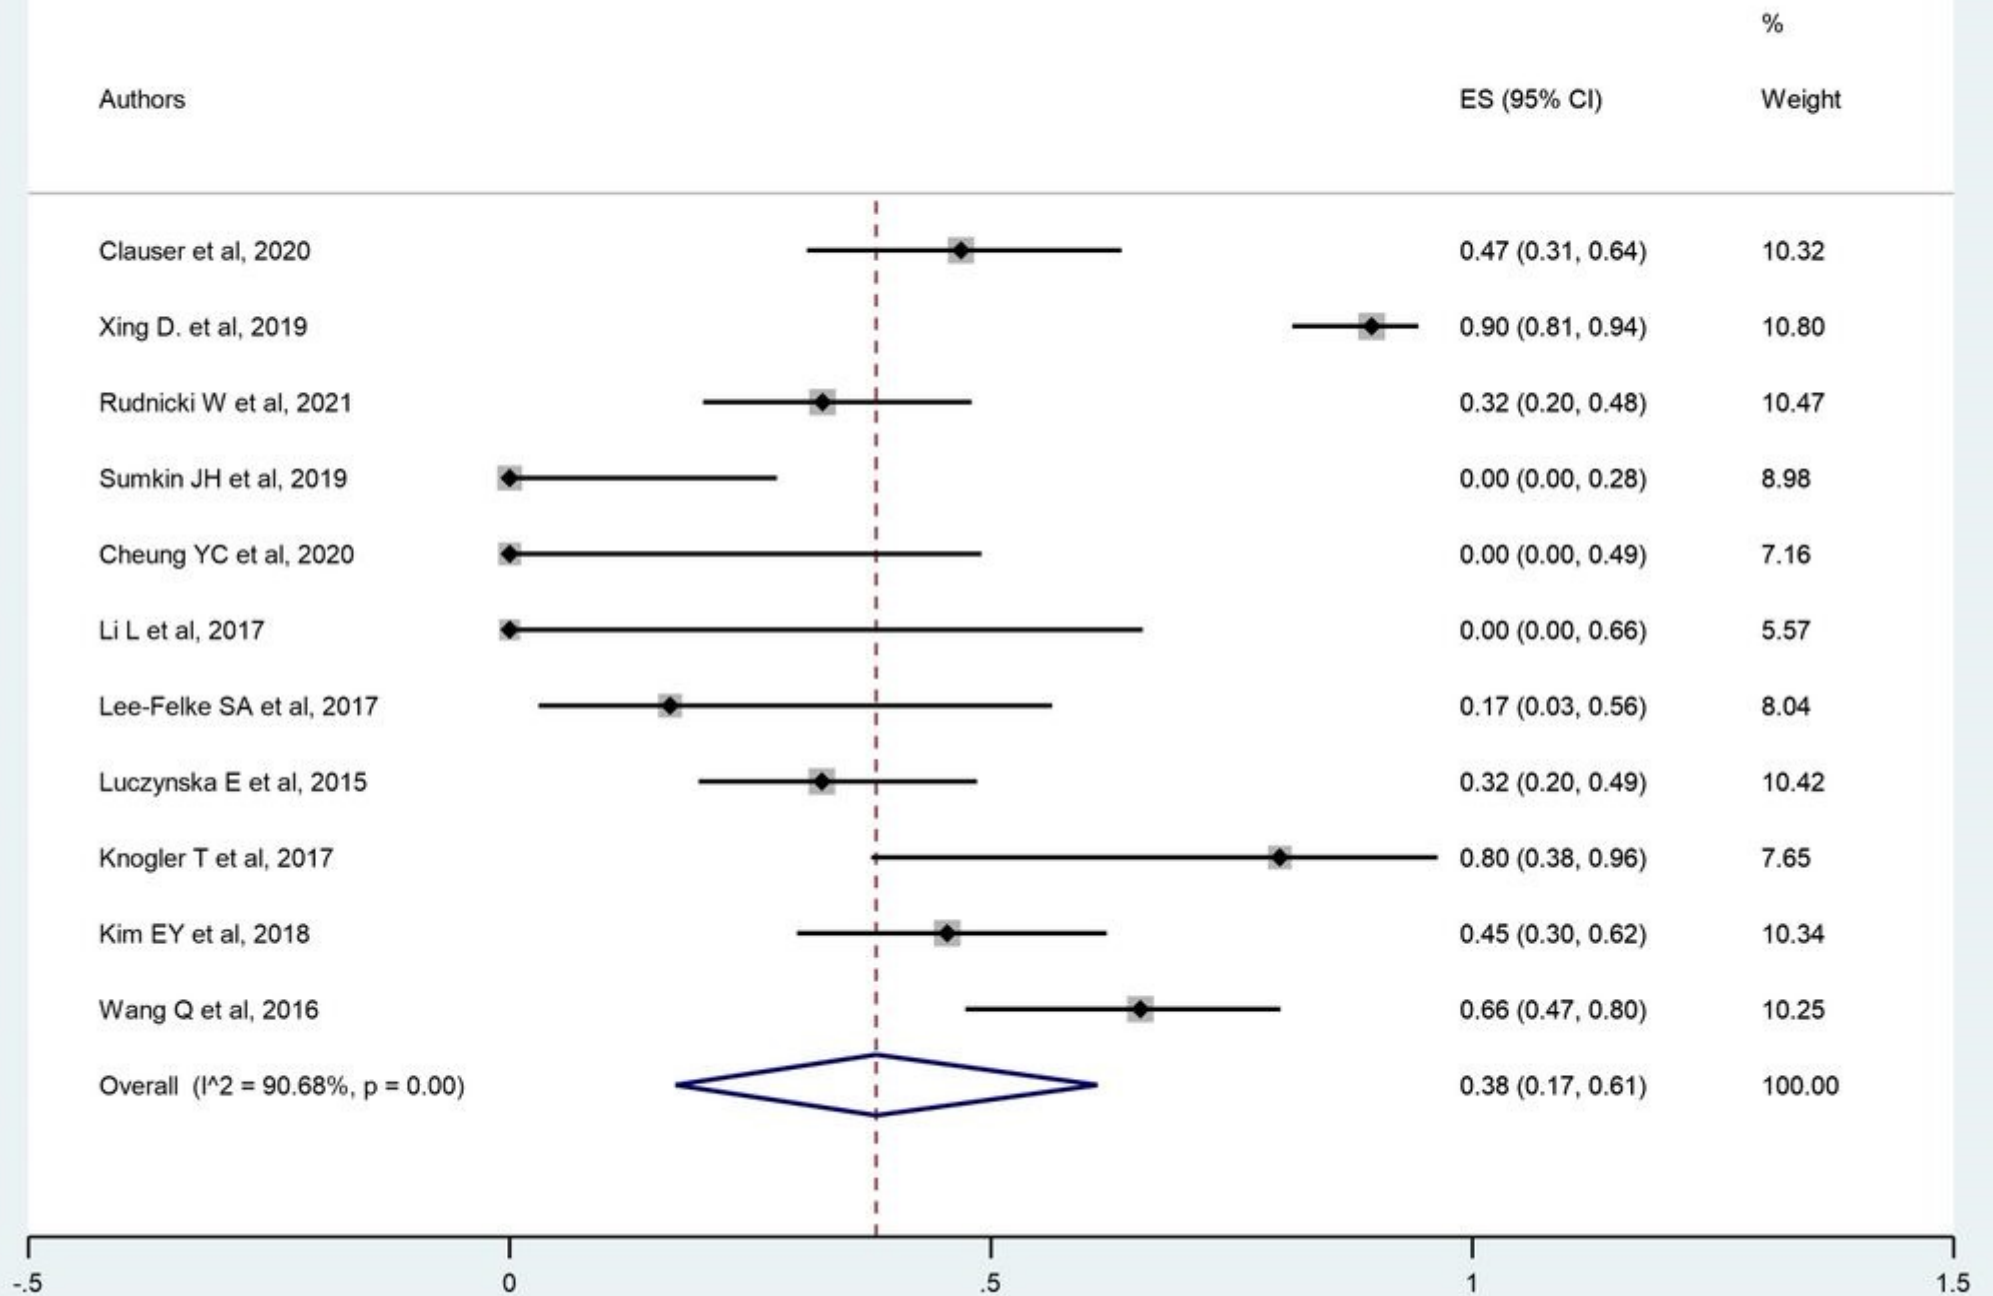

Supplement: s1 [file s1]

# CEM specificity

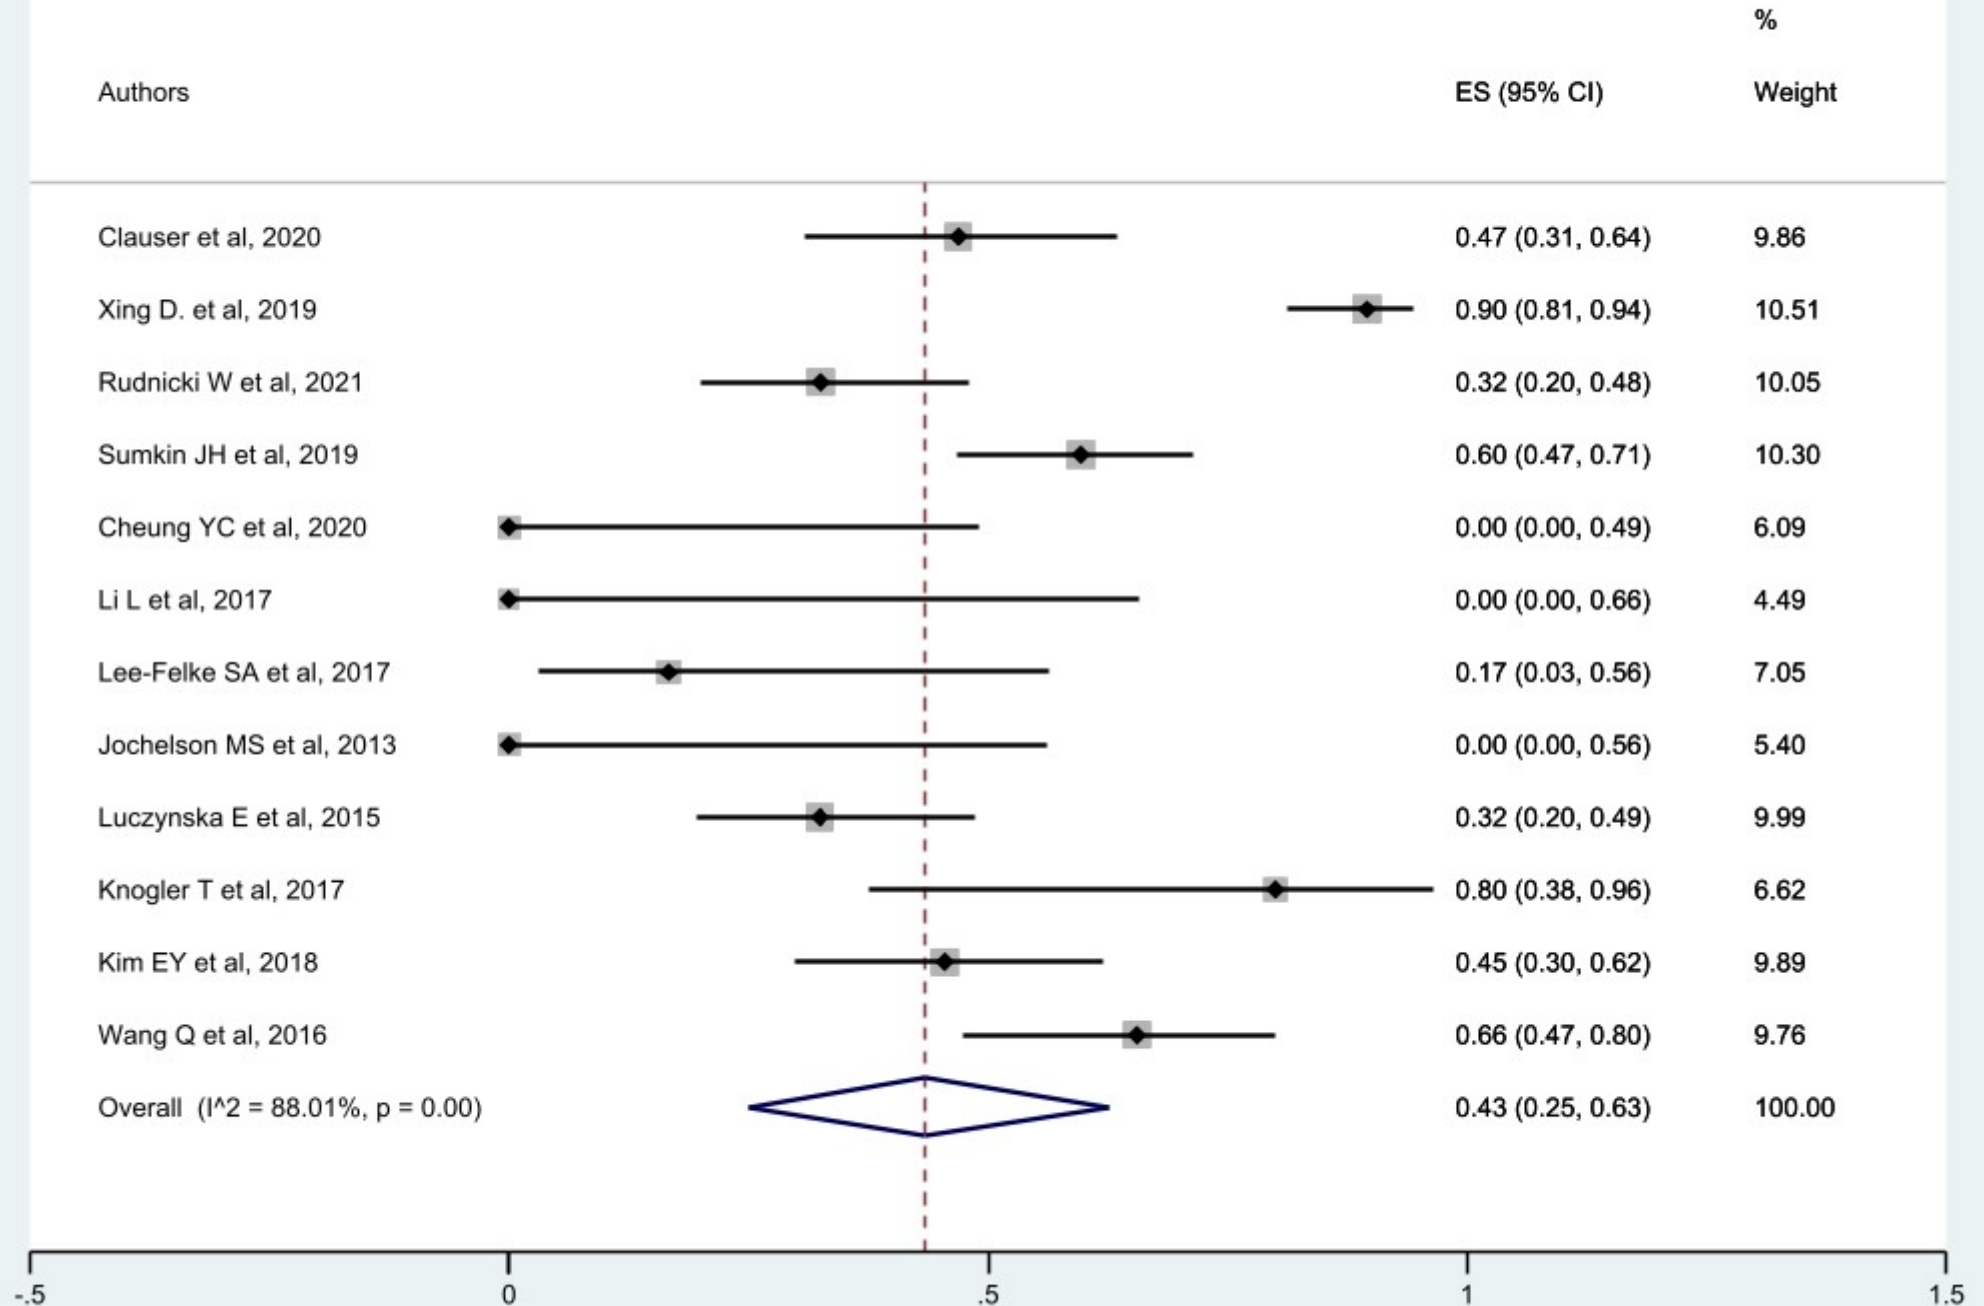

Supplement: s1 [file s1]
